# Supplementary figures and images for: Genome‐wide association study of fleece traits in Inner Mongolia Cashmere goats
Source: PubMed Central journal article supplement — Anim Genet. 2021 Mar 28;52(3):375–9. doi: 10.1111/age.13053 (PMC8251931; doi:10.1111/age.13053), 2021-03-28

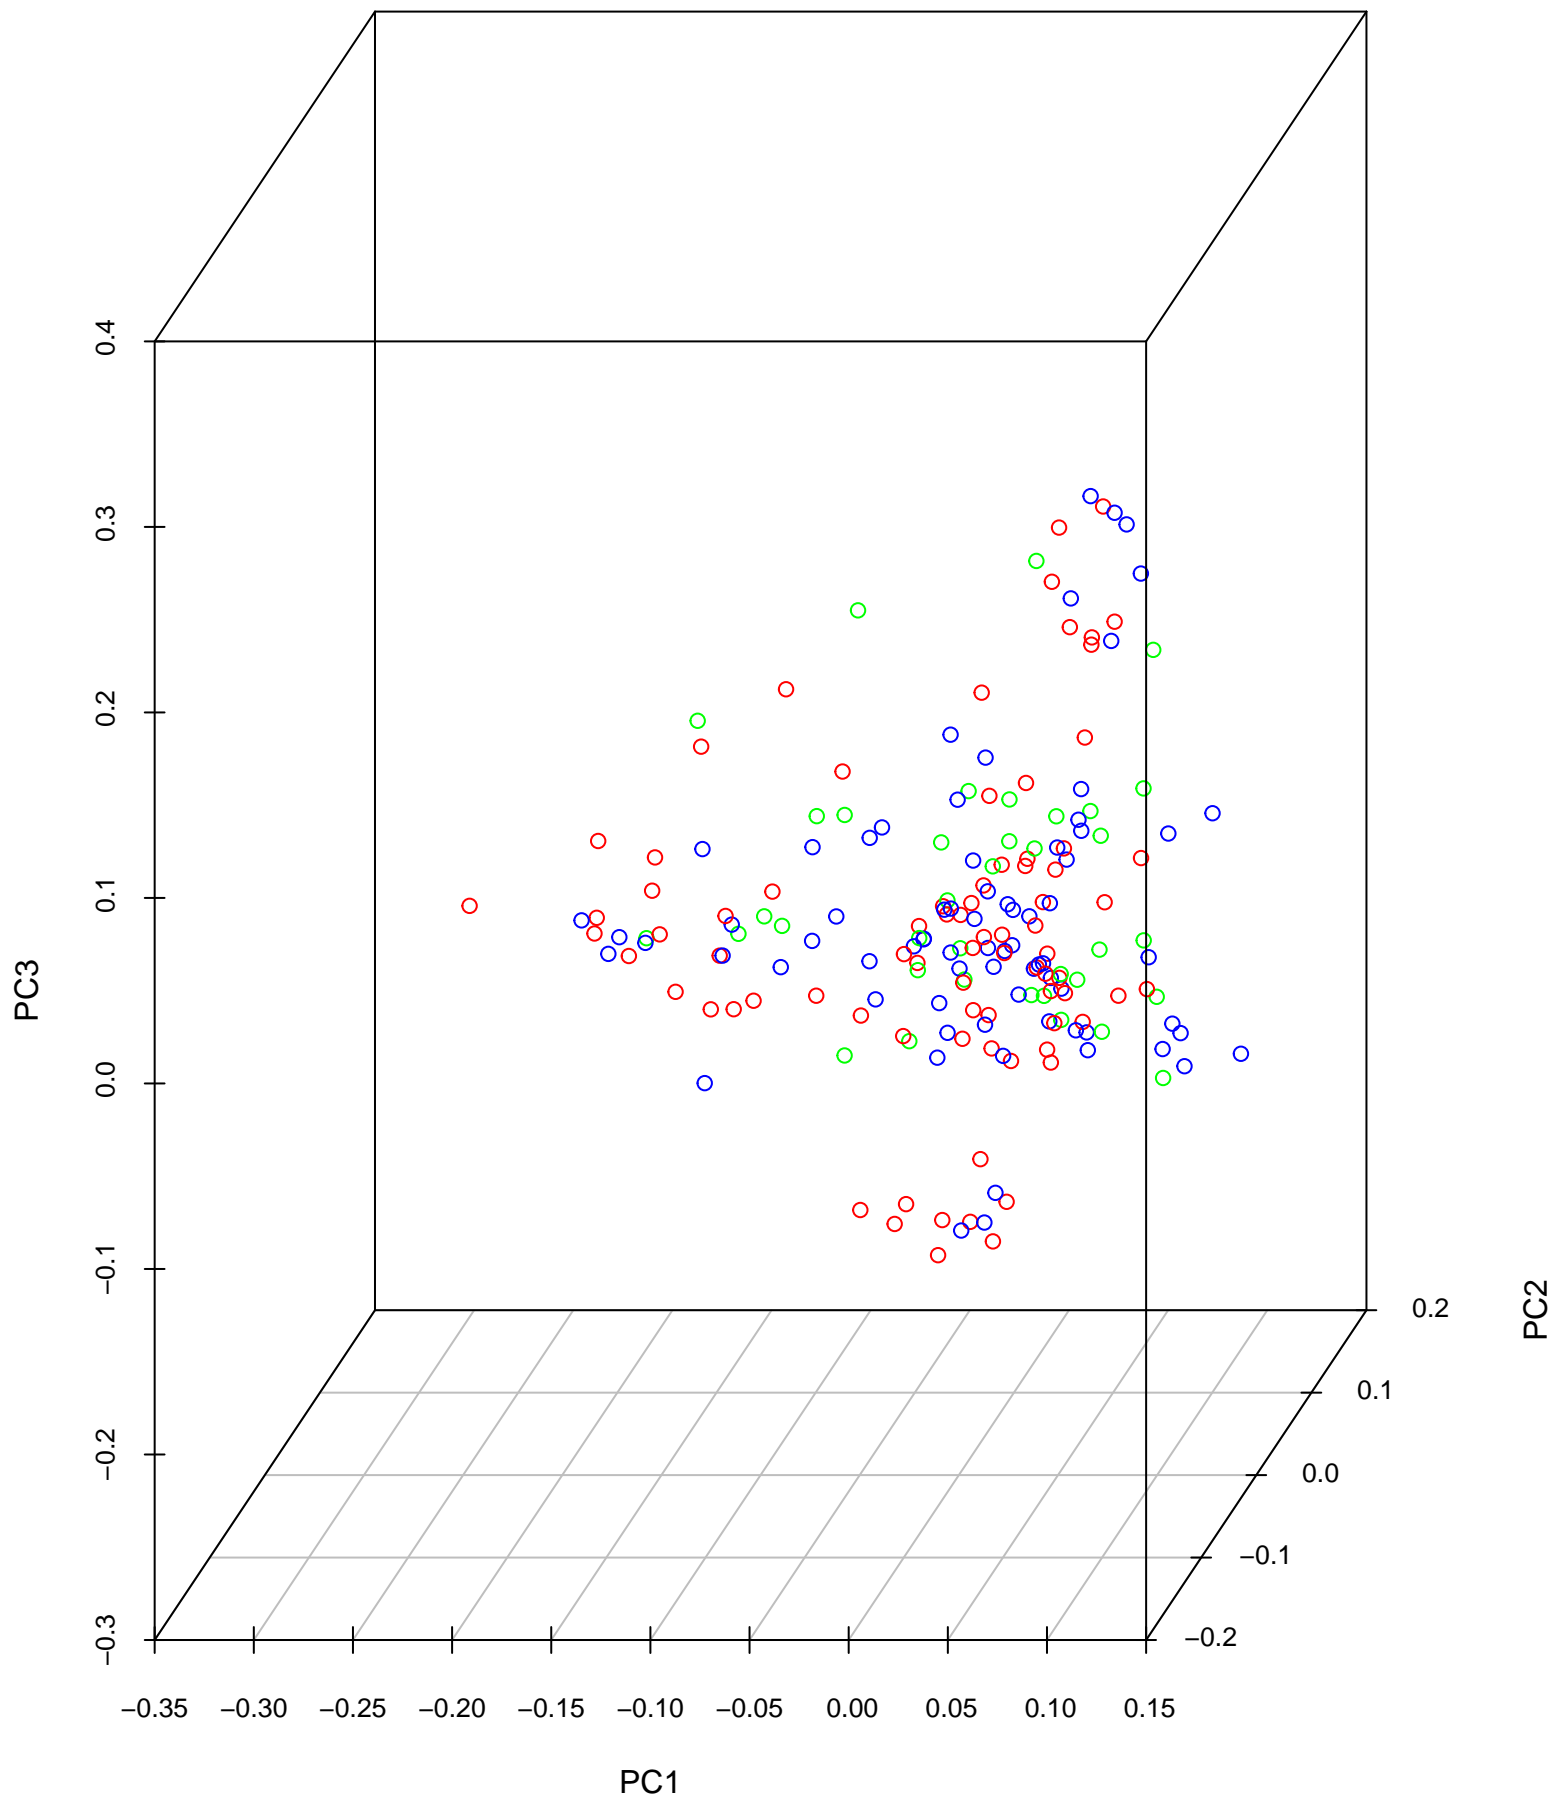

Supplement: AGE-52-375-s001.pdf [file AGE-52-375-s001.pdf]

# The number of SNPs within 1Mb window size

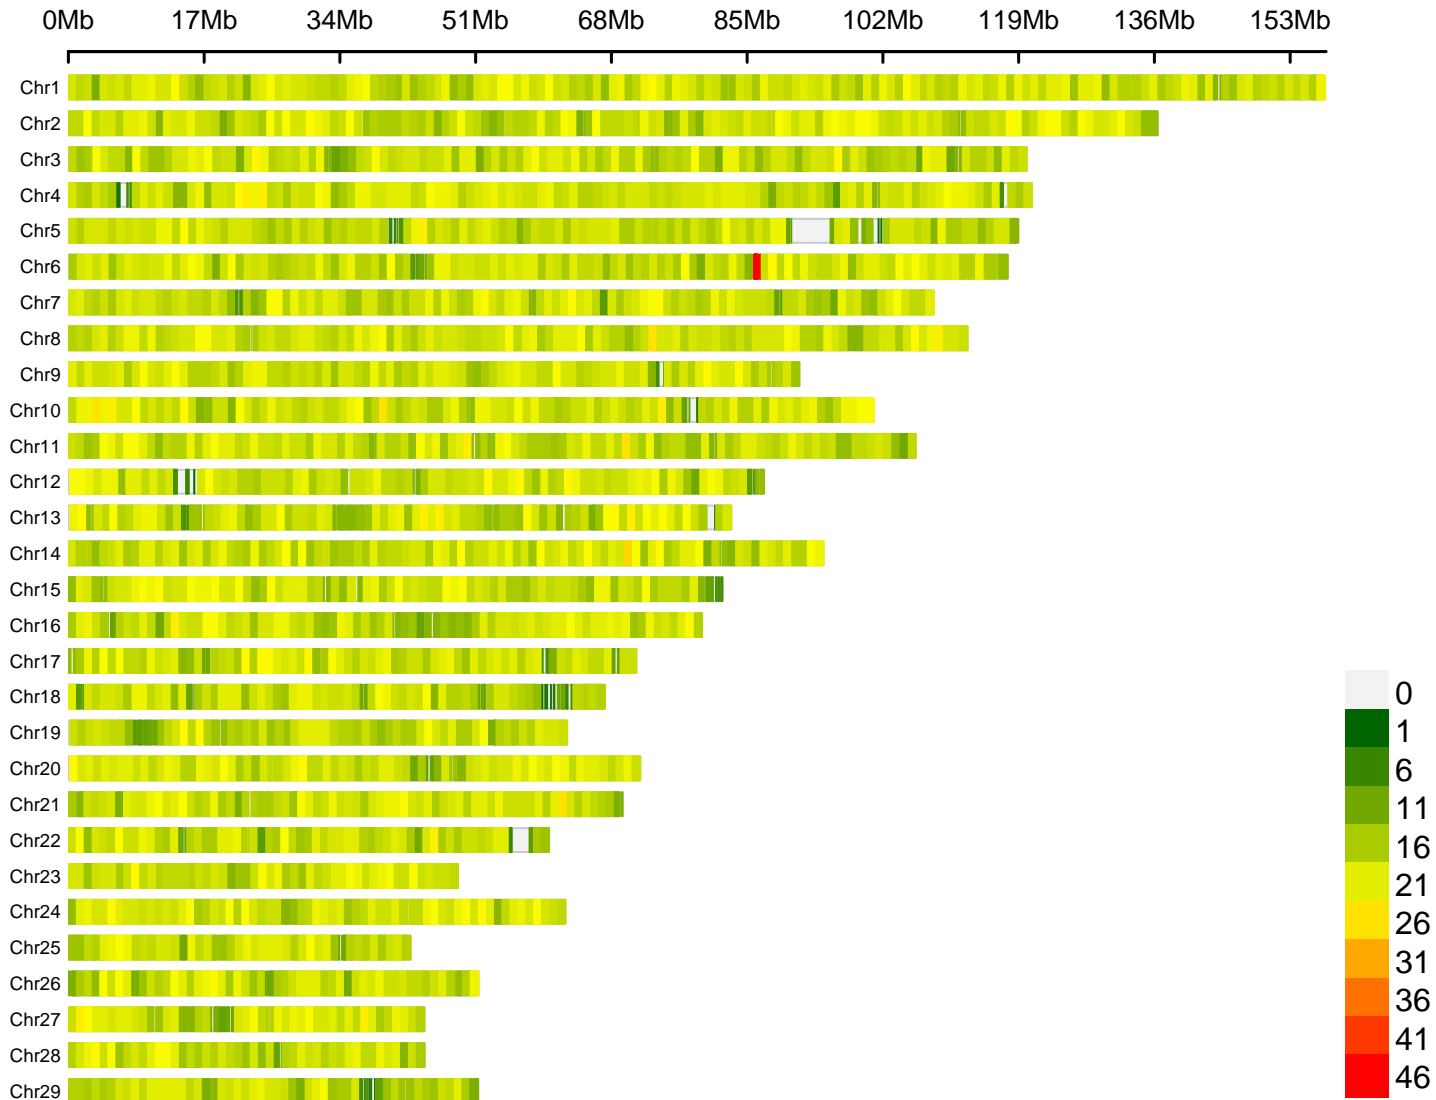

Supplement: AGE-52-375-s002.pdf [file AGE-52-375-s002.pdf]

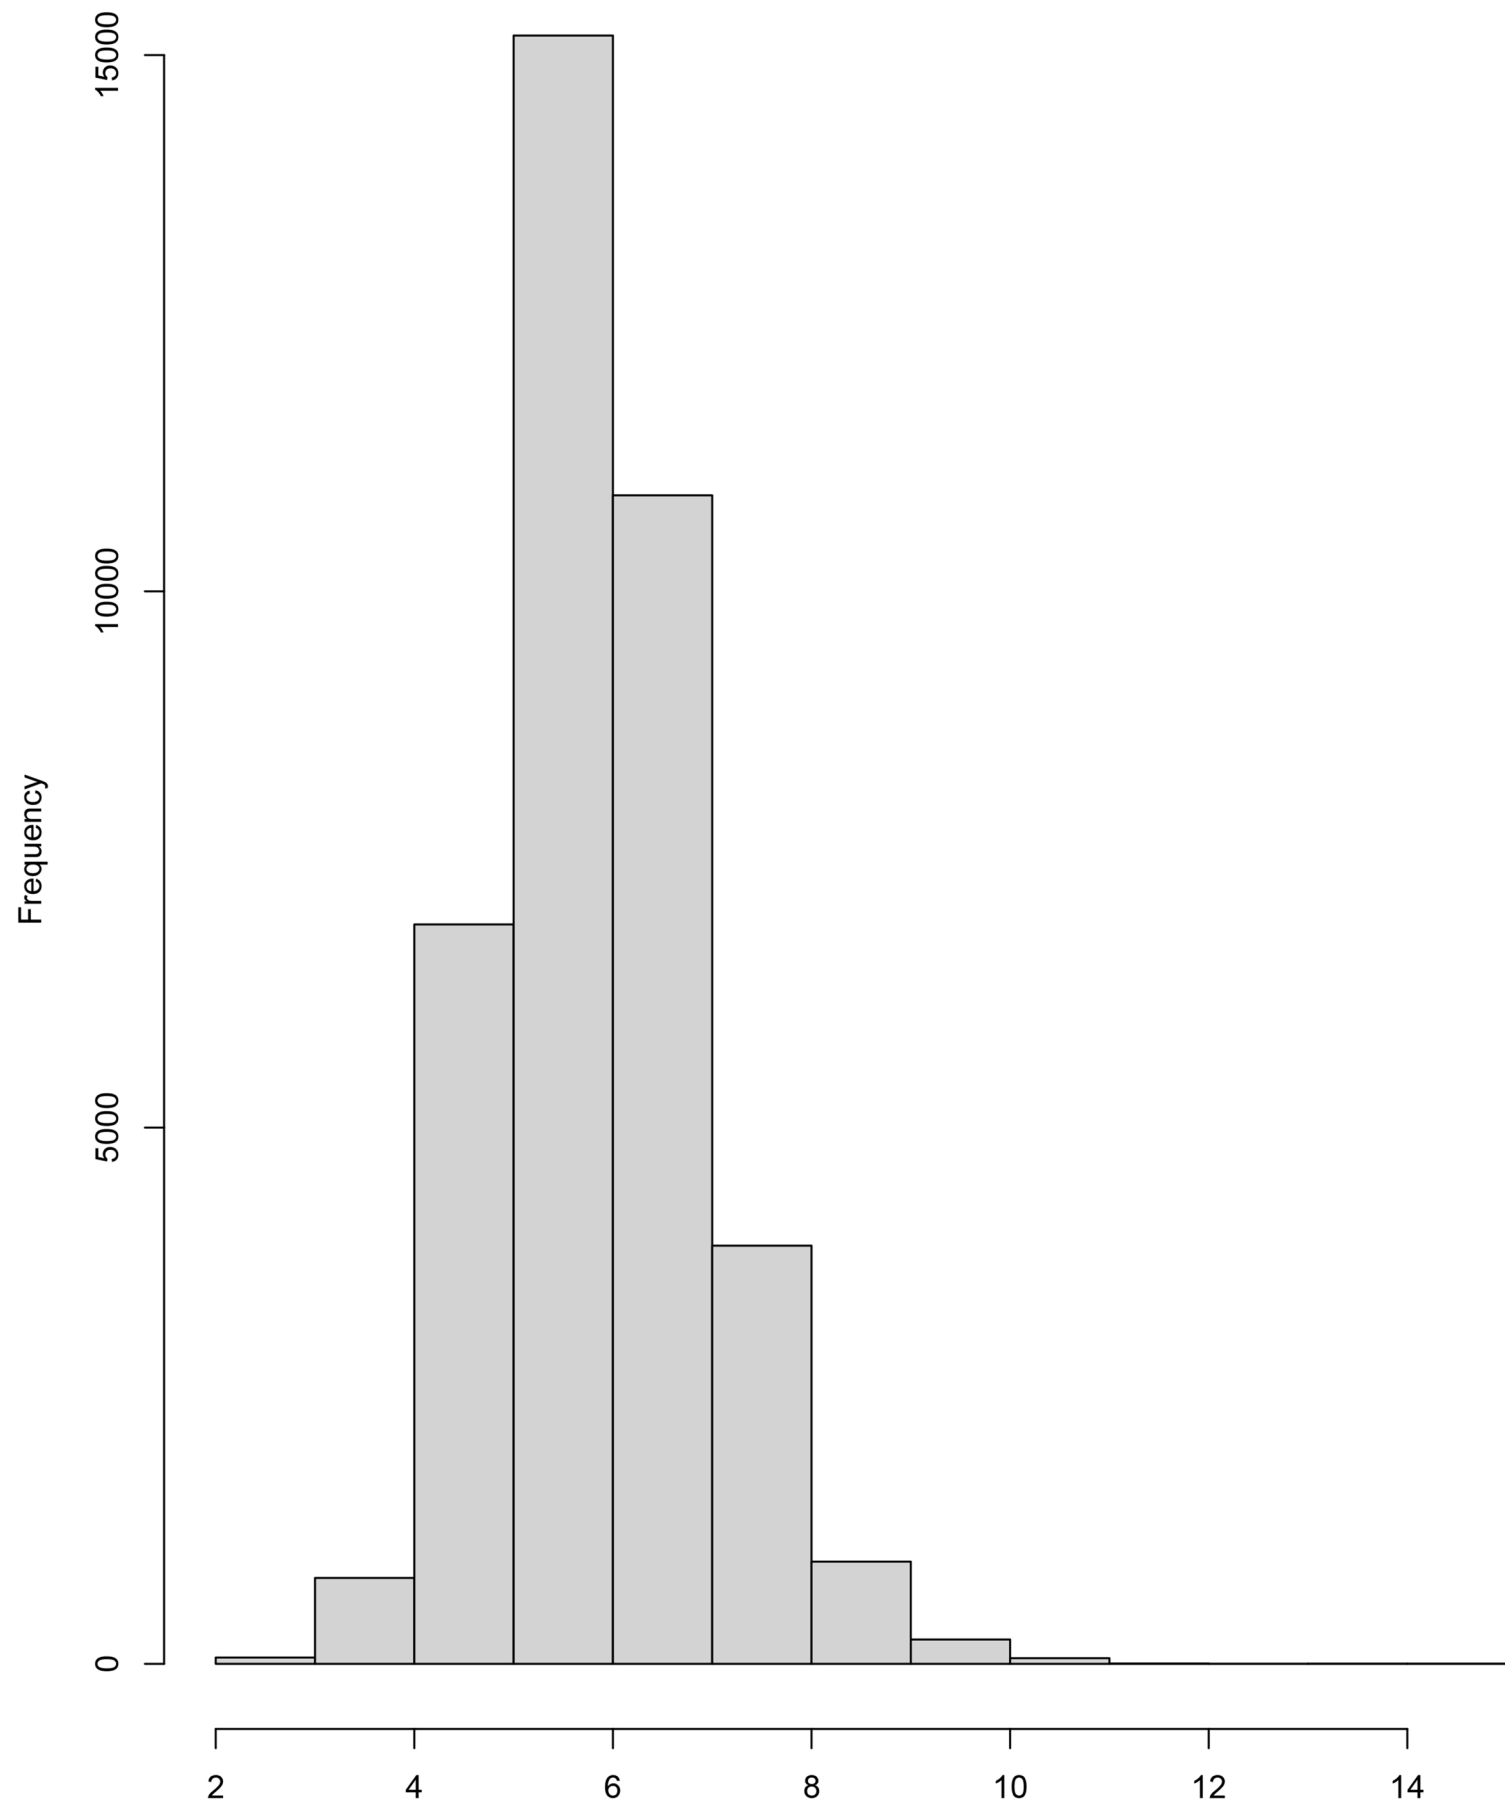

**A**

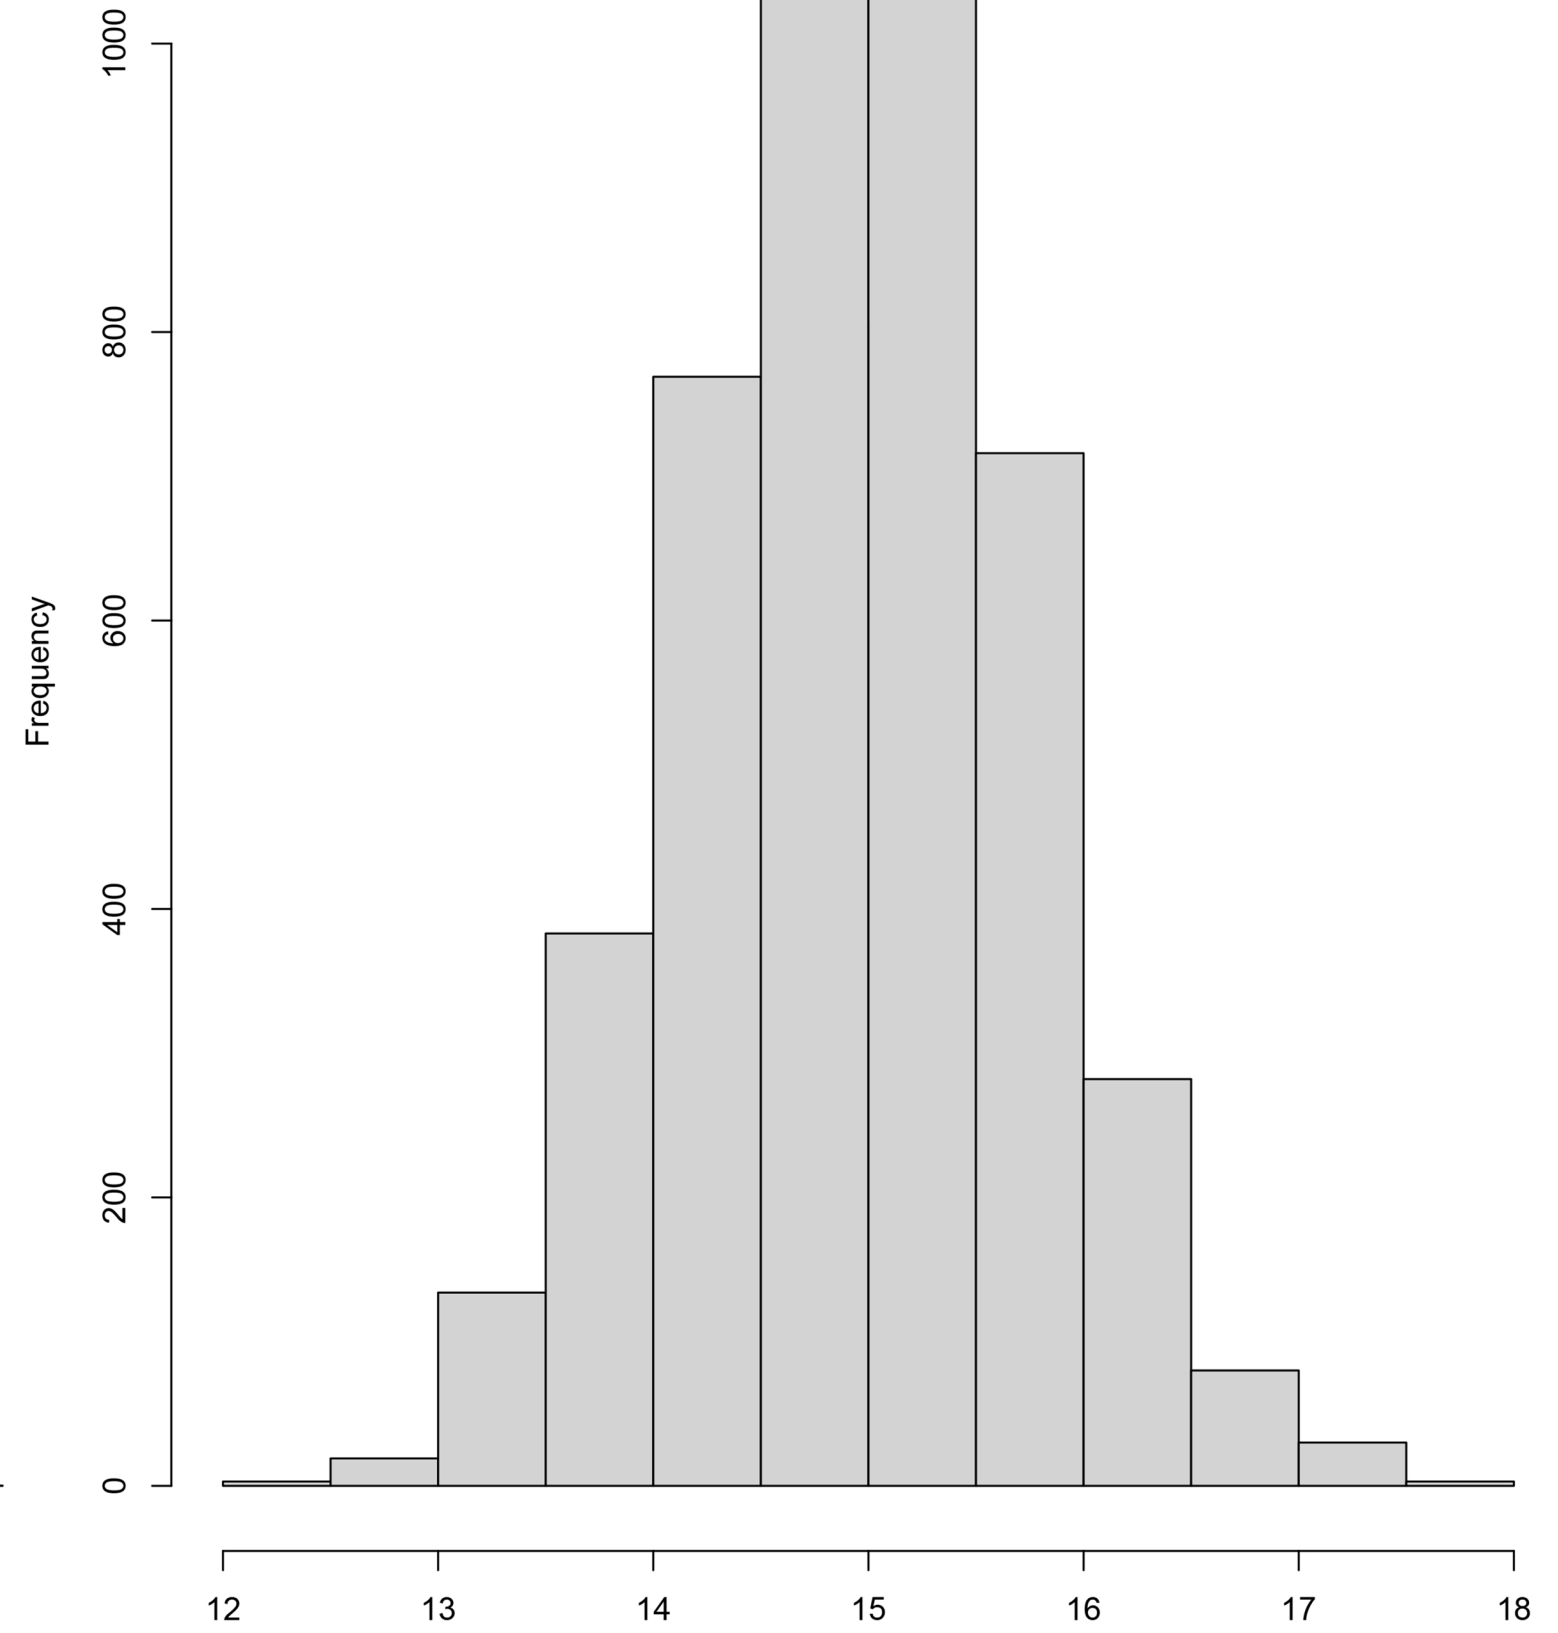

**B**

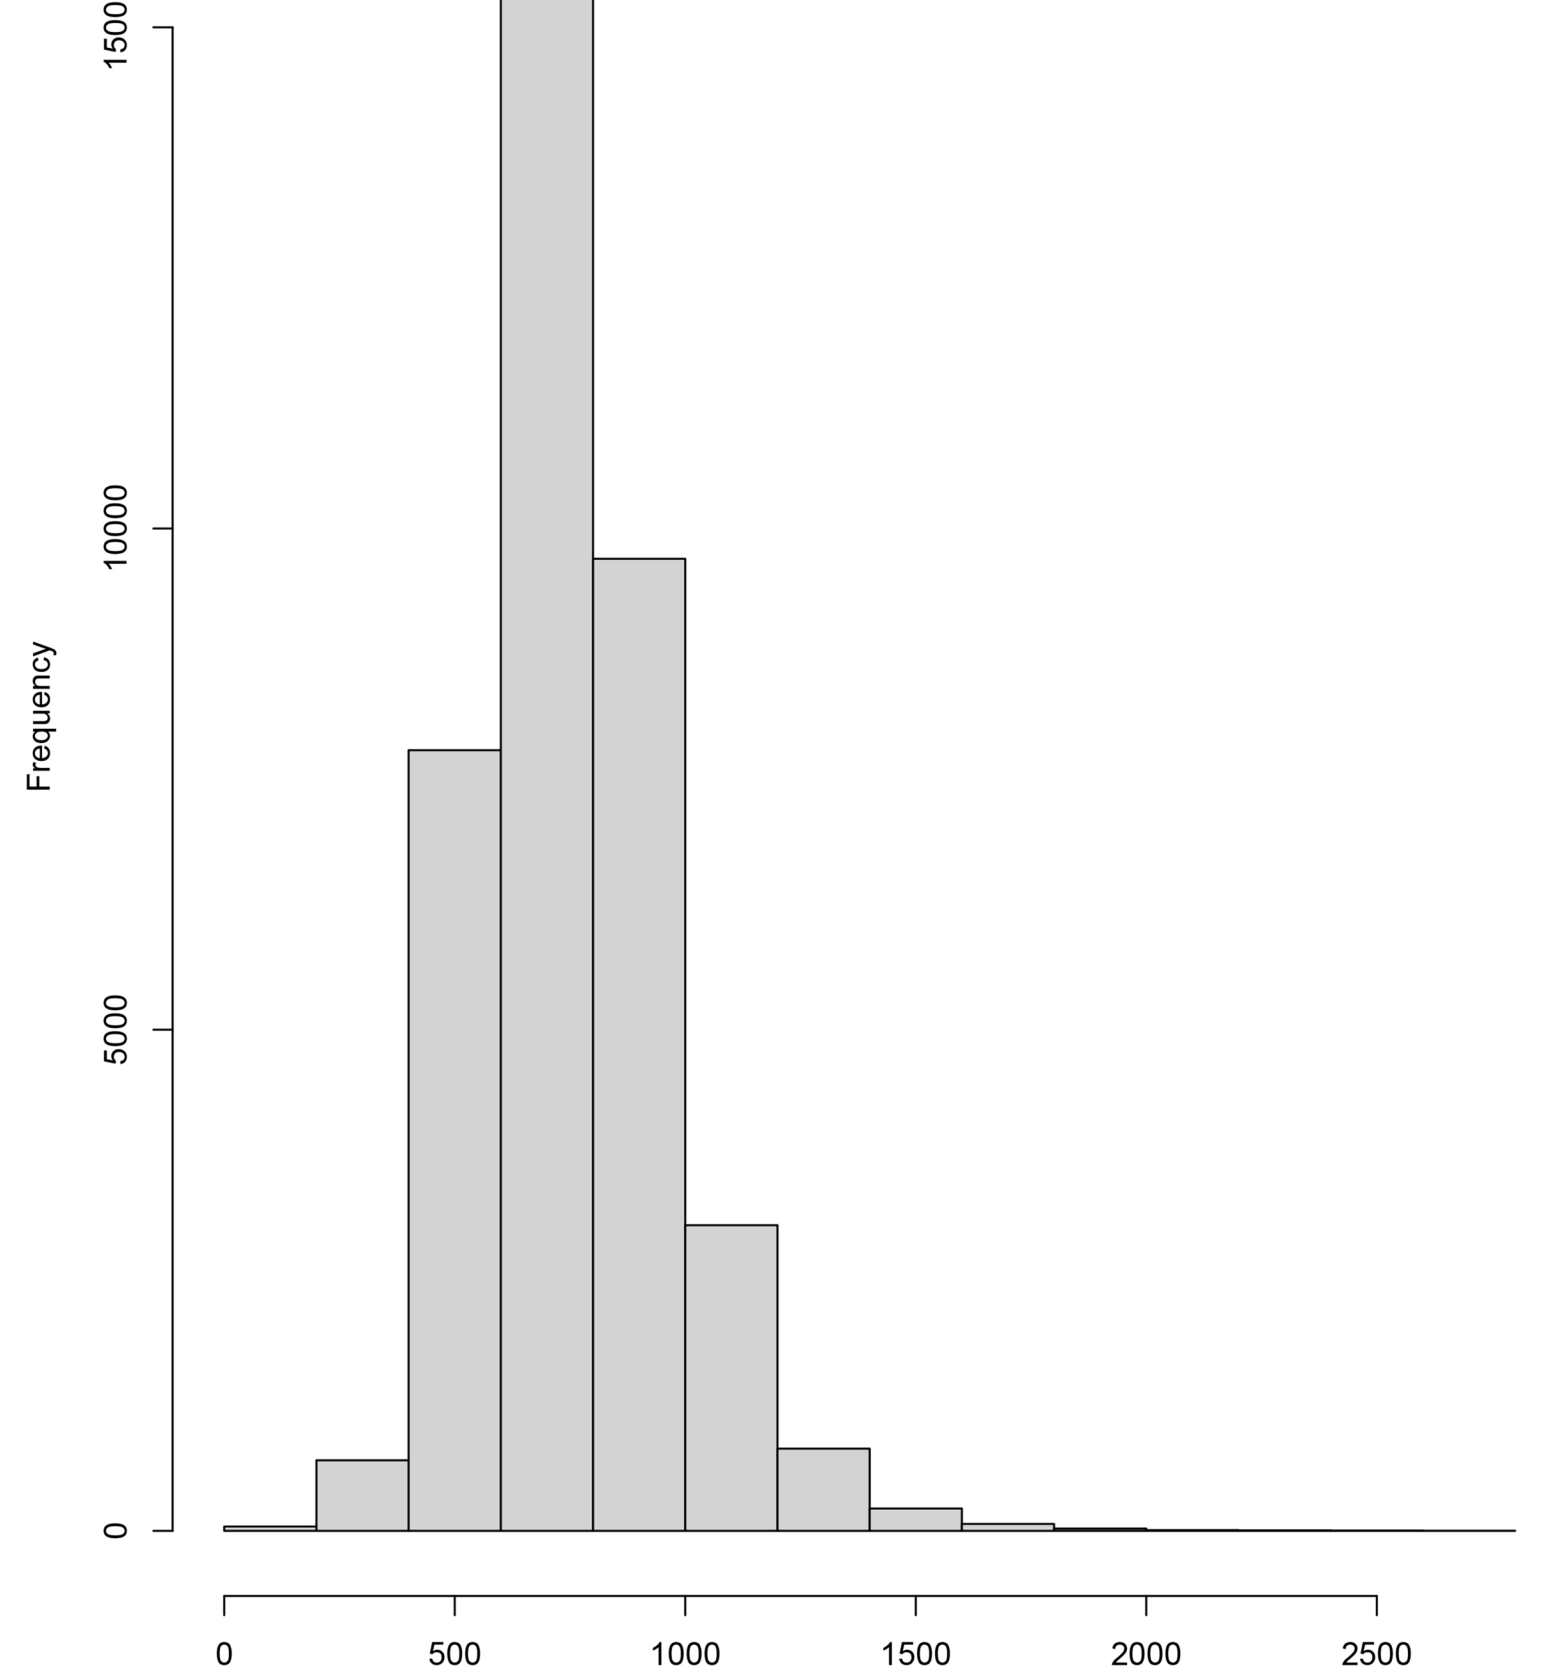

**C**

Supplement: AGE-52-375-s004.pdf [file AGE-52-375-s004.pdf]
